# Supplementary material
Source: PubMed Central journal article supplement (PMC7386462)
Supplement: NIHMS1601610-supplement-2.pdf [file NIHMS1601610-supplement-2.pdf]

## SUPPLEMENTAL FIGURES

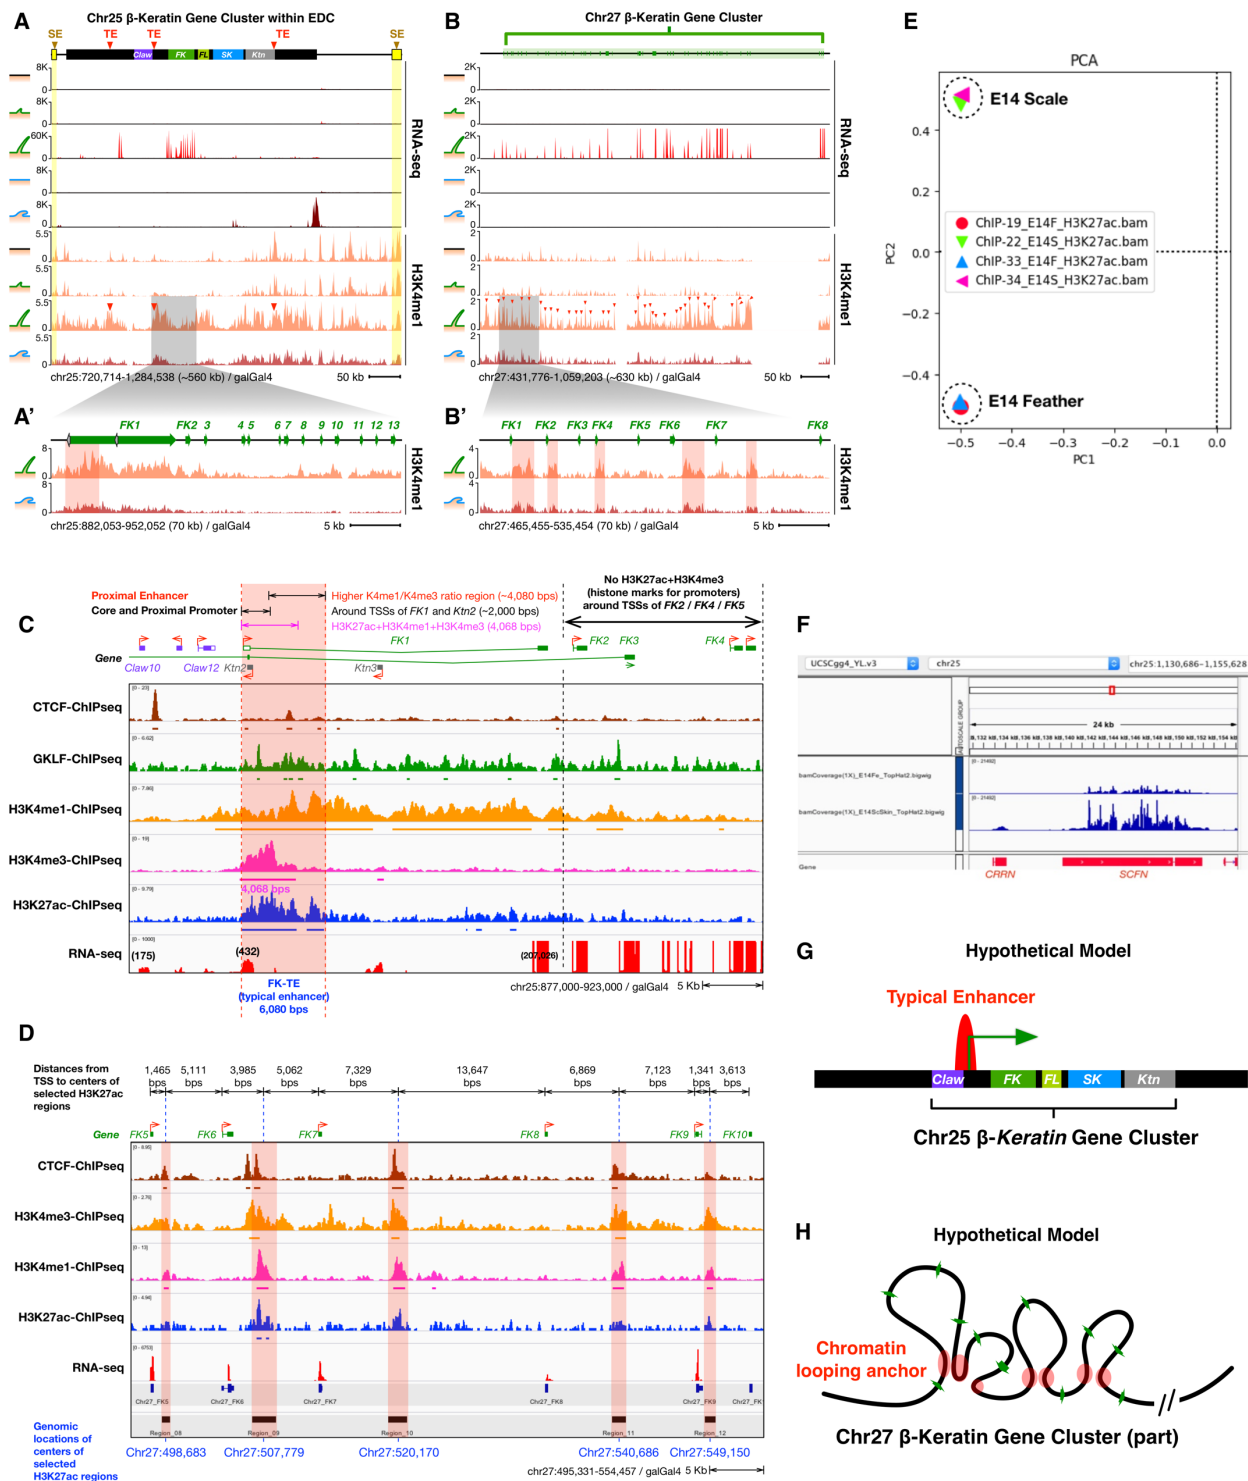

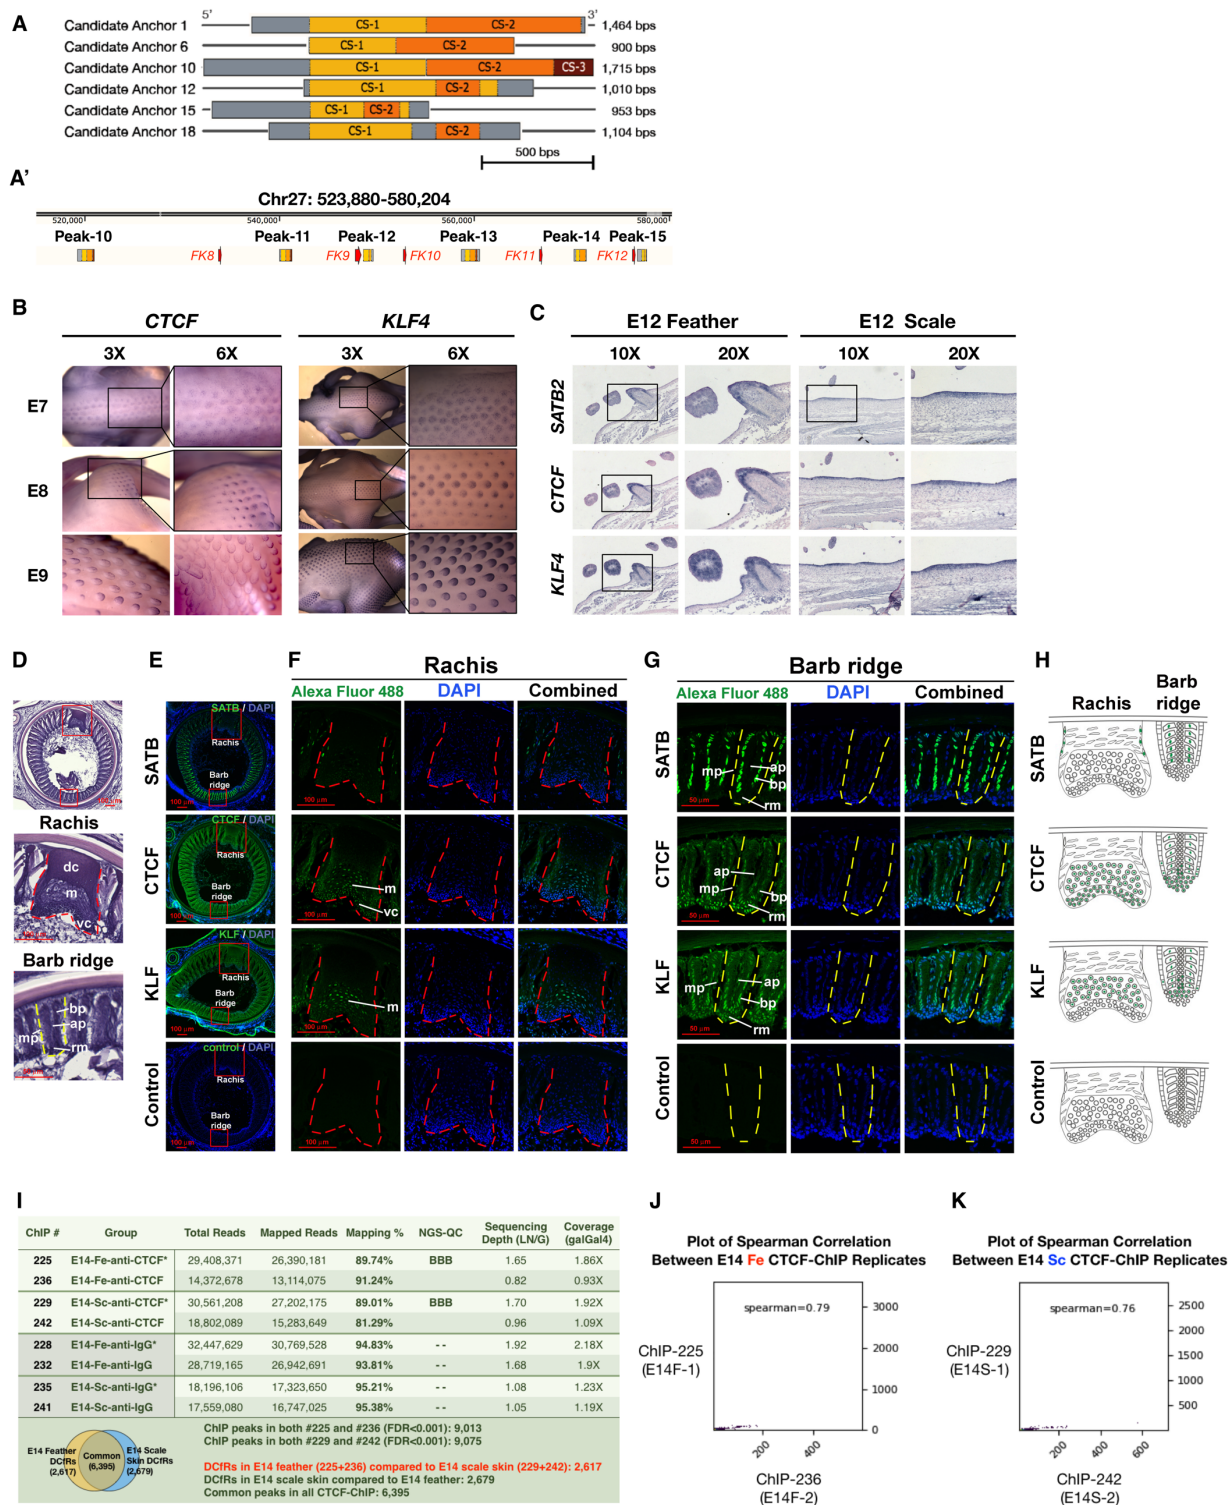

**Figure S2. Discovery of consensus sequences from H3K27ac regions of the Chr27  $\beta$ -keratin gene cluster and expression patterns of CTCF, KLF4, and SATB2 during avian skin development. Related to Figure 2.** (A) Alignment of SnapGene features of candidate looping anchors on the Chr27  $\beta$ -krt cluster. (A') Relative locations of consensus regions in the candidate looping anchors (Peak-10 to Peak-15). (B) *ISH* of CTCF and KLF4 in embryonic chicken skin. (C) *ISH* of CTCF, KLF4, and SATB2 at chick embryonic stage E12. (D-H) IM of SATBs, CTCF, and KLFs in developing feather follicles. (D) H&E staining of a flight feather follicle from E21.1. Middle and lower panels are rachis and barb ridge with higher magnification, respectively. Note the enlarged barb ridge image has been rotated 180 degrees. The developing rachis is composed of the dorsal cortex (dc), medulla (m) and ventral cortex (vc). A barb ridge includes a barbule plate (bp), axial plate (ap), marginal plate (mp) and a ramus zone (rm). Only the ramus zone and barbule plate will form the final feather structure. Other cell types will go through apoptosis and disappear when the mature feather opens. (E) IM of SATBs (first row), CTCF (second row), KLFs (third row) and control without primary antibody (fourth row). (F-G) IM of rachis and barb ridge, respectively. Left column, shows fluorescent IM signals. Middle column, DAPI staining. Right column, combined channels. In panels G and J, dotted red lines outline the rachis, whereas dotted yellow lines outline a single barb ridge. (H) Schematic drawing summarizing the strong expression patterns of these factors. (I) Quality control of CTCF-ChIP. (J-K) Spearman correlation of CTCF-ChIP duplicates.

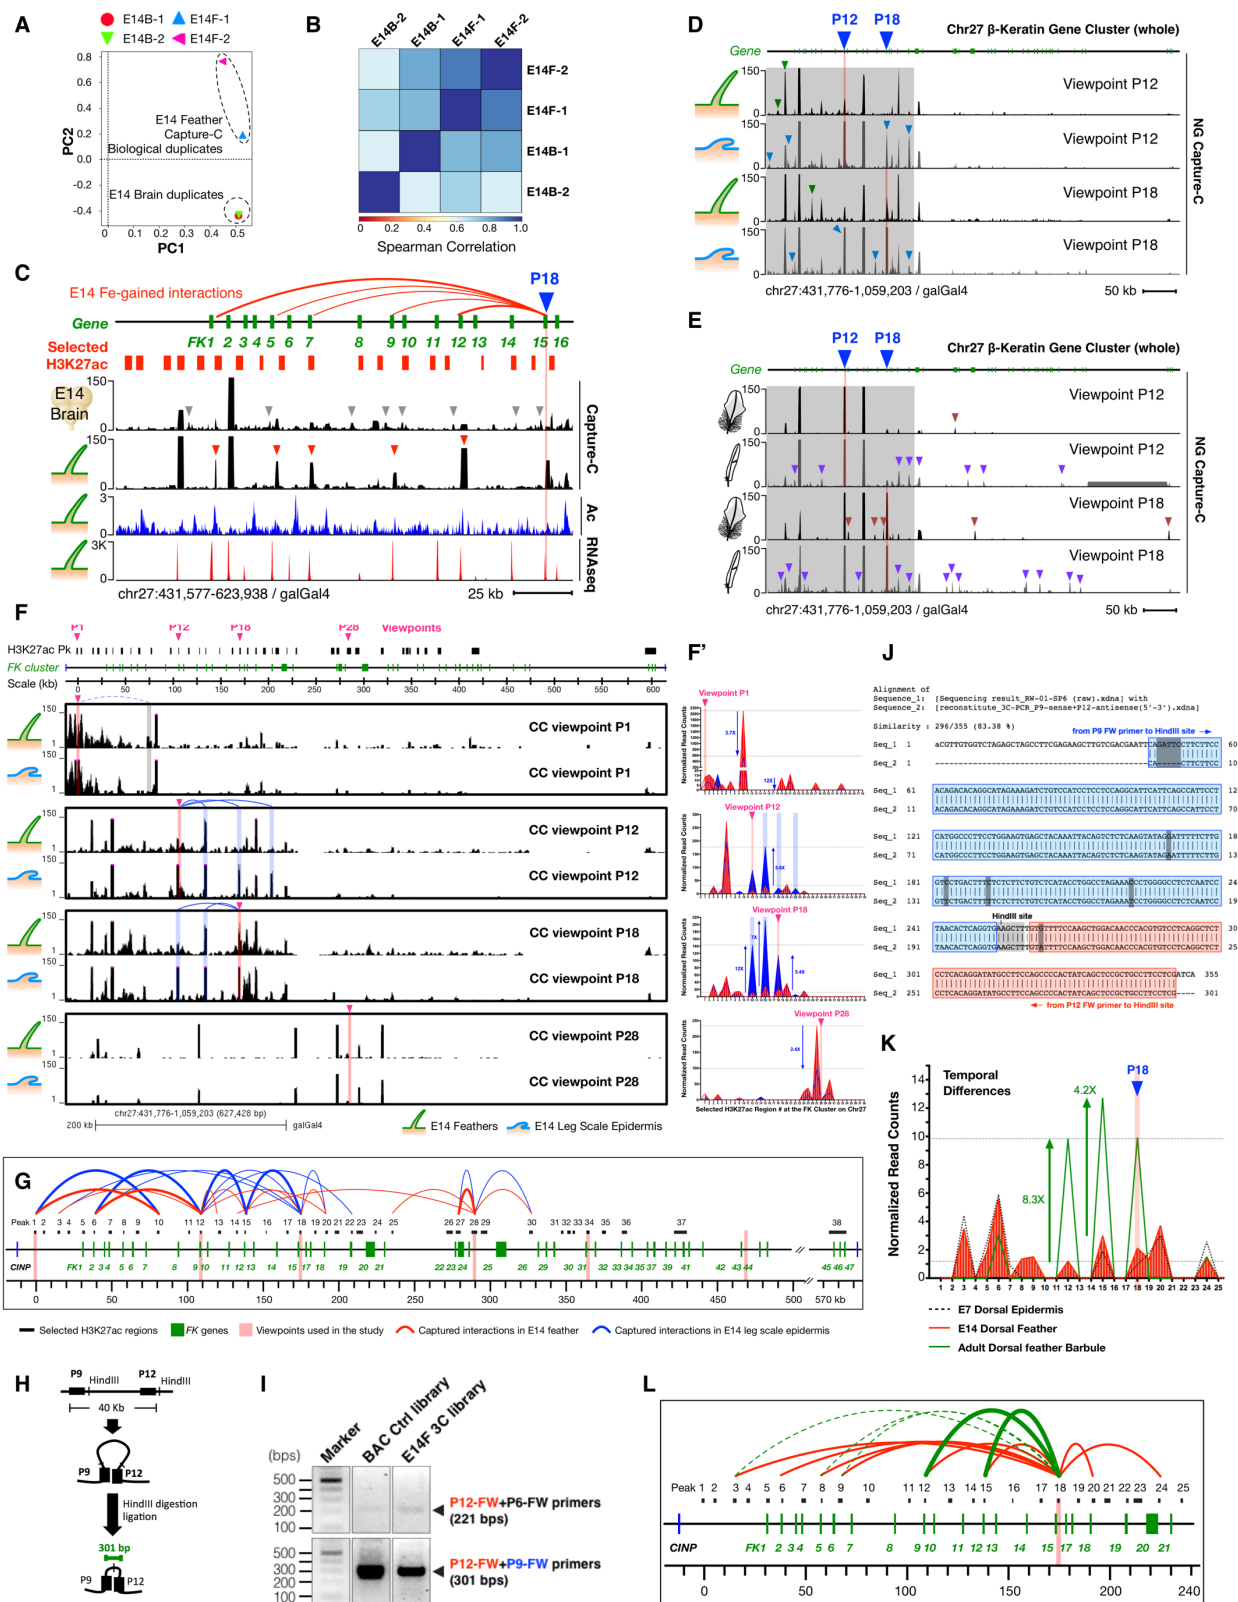

**Figure S3. Validation of chromatin interactions at the *Keratin* gene clusters by NG Capture-C and 3C-PCR. Related to Figure 3. (A)** A PCA plot of NG Capture-C duplicates. E14B-1/-2, embryonic stage Day 14 whole brain tissue, replicate 1/2; E14F-1/-2, embryonic stage Day 14 feather filament base, replicate 1/2. **(B)** Spearman correlation of NG Capture-C duplicates. **(C)** A whole cluster view of NG Capture-C interactions of different skin regions (feather filaments and scale epidermis) from the same aged chicks (E14). **(D)** A whole cluster view of NG Capture-C interactions of different feather types (dorsal contour feather barbules and flight feather barbules) from the same aged adult chickens. **(E)** NG Capture-C interactions of different skin regions (feather filaments and scale epidermis) from the same aged chicks (E14) using viewpoints P1/P12/P28. **(F)** Normalized read counts of panel S3F. **(G)** Illustration of region-specific chromatin interactions of the feather- and scale-bearing skin at E14. **(H)** Schematic of the 3C-PCR primer design. **(I)** DNA agarose gel results of the P12-P9 interacting band. **(J)** TA-cloning of the P12-P9 interacting band and its sequencing result. **(K)** Normalized read counts of captured chromatin interactions from panel 3E. **(L)** Schematic of dynamic intra-cluster chromatin looping of Chr27  $\beta$ -krt cluster during feather skin development.



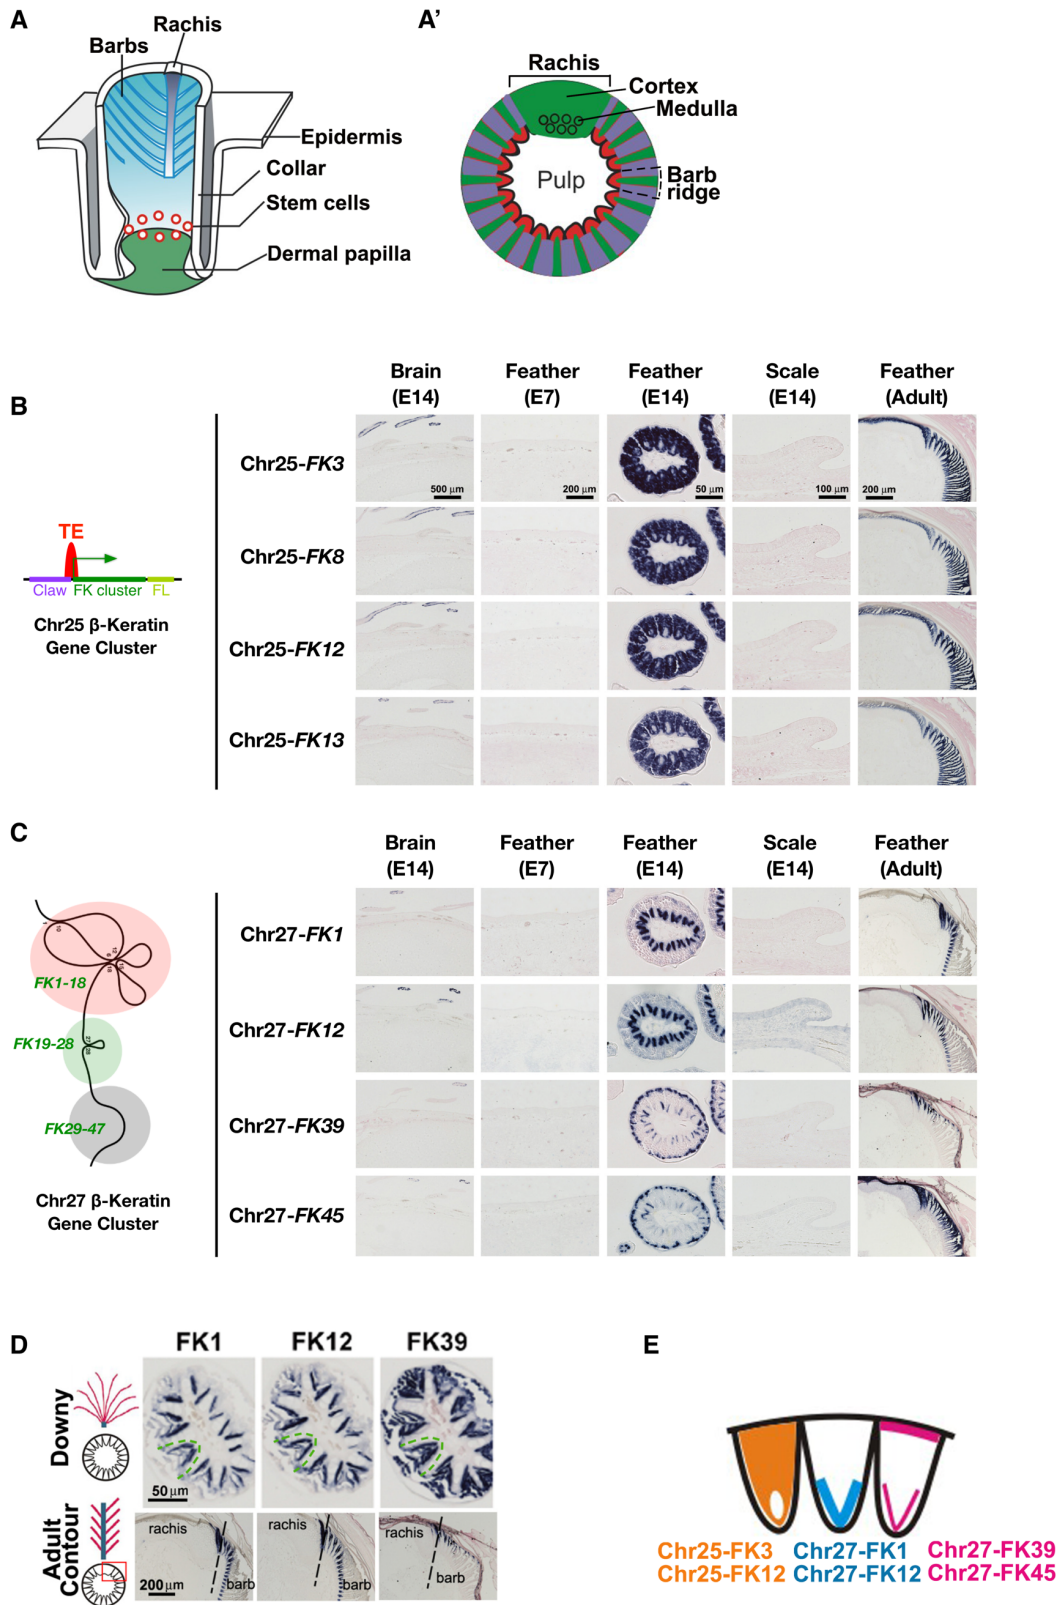

**Figure S4. Expression of  $\beta$ -keratin genes in different skin regions during development. Related to Figure 4.** (A to A') Schematic drawing (A) and cross-section (A') of a feather follicle. (B-D) A full panel of *ISH* results of *FK* genes in different skin regions and the brain (control). (E) Schematic of a feather cross-section, showing expression patterns of indicated keratins in a barb ridge.



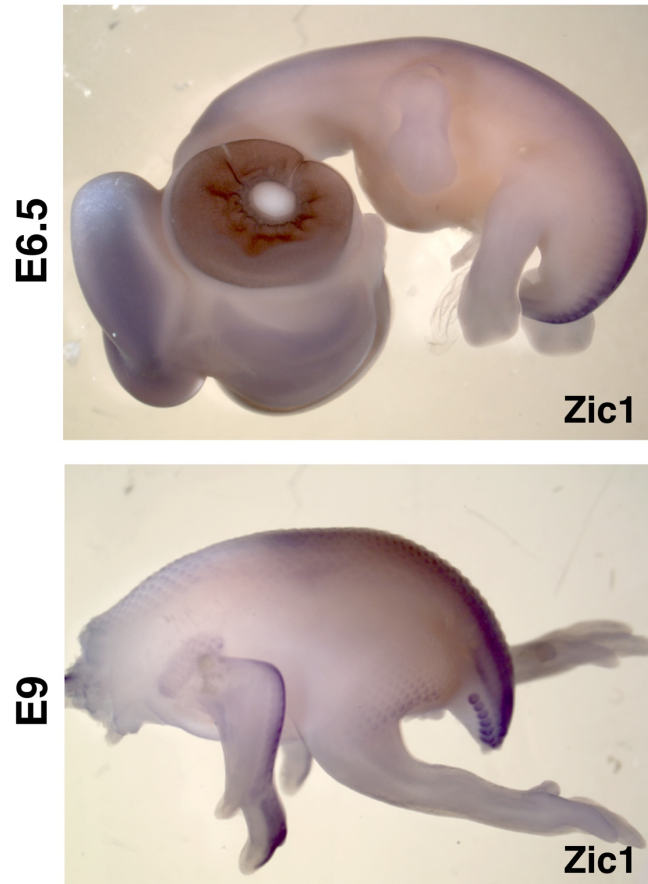

Figure S5. *In-situ* hybridization of *Zic1* during chicken embryonic development. Related to Figure 5.

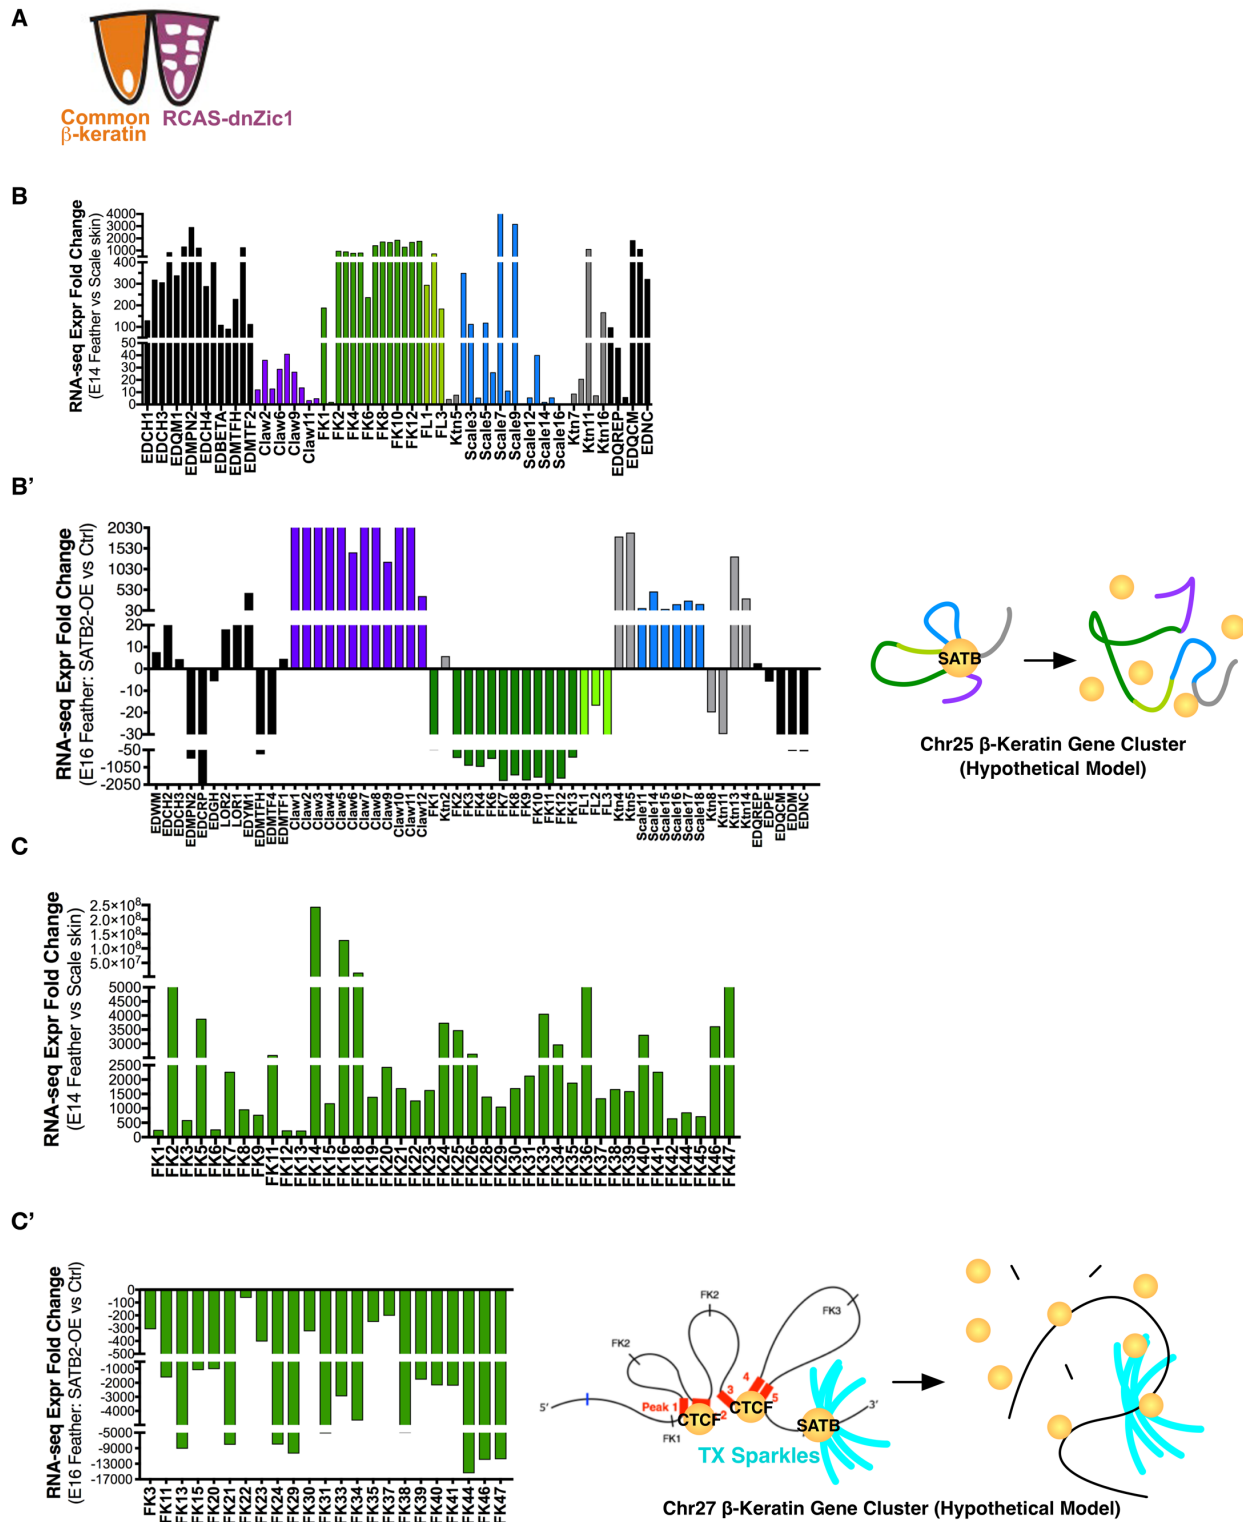

**Figure S6. Misexpression of feather specifier *Zic1* and chromatin regulator *SATB2* disrupts expression profiles of  $\beta$ -keratin genes. Related to Figure 6. (A)** Schematic of a feather cross-section from Figure 6C, showing expression patterns of  $\beta$ -krt genes in a barb ridge when over-expression of dnZic1. (B) RNA-seq expression fold changes of Chr25  $\beta$ -krt genes using normal E14 feather compared to scale skins. (C) RNA-seq expression fold changes of Chr27  $\beta$ -krt genes using normal E14 feather compared to scale skins. (C') RNA-seq expression fold changes of Chr27  $\beta$ -krt genes using E16 RCAS-SATB2-infected feather skins compared to un-infected skins. The right panel shows a hypothetical model of how misexpression of SATB2 disrupts expression of *FK* genes on the Chr27  $\beta$ -krt cluster.

## SUPPLEMENTAL TABLES

Table S2. Genomic locations of selected candidate looping anchors. Related to Figure 3.

| Candidate Looping Anchor # | Relative Position                                          | Position (galGal4)        | Size (bps) |
|----------------------------|------------------------------------------------------------|---------------------------|------------|
| Peak 1                     | before <i>FK1</i>                                          | chr27:441,776-443,239     | 1,464      |
| Peak 2                     | before <i>FK1</i>                                          | chr27:446,178-447,746     | 1,569      |
| Peak 3                     | before <i>FK1</i>                                          | chr27:458,467-460,144     | 1,678      |
| Peak 4                     | before <i>FK1</i>                                          | chr27:463,986-465,668     | 1,683      |
| Peak 5                     | between <i>FK1</i> and <i>FK2</i>                          | chr27:472,466-474,122     | 1,657      |
| Peak 6                     | between <i>FK2</i> and <i>FK3</i>                          | chr27:479,712-480,611     | 900        |
| Peak 7                     | right after <i>FK4</i>                                     | chr27:488,381-490,636     | 2,256      |
| Peak 8                     | after <i>FK5</i>                                           | chr27:498,294-499,070     | 777        |
| Peak 9                     | between <i>FK6</i> and <i>FK7</i>                          | chr27:506,688-508,869     | 2,182      |
| Peak 10                    | between <i>FK7</i> and <i>FK8</i>                          | chr27:519,312-521,026     | 1,715      |
| Peak 11                    | between <i>FK8</i> and <i>FK9</i>                          | chr27:540,047-541,324     | 1,278      |
| Peak 12                    | after <i>FK9</i>                                           | chr27:548,645-549,654     | 1,010      |
| Peak 13                    | between <i>FK10</i> and <i>FK11</i>                        | chr27:558,703-560,605     | 1,903      |
| Peak 14                    | between <i>FK11</i> and <i>FK12</i>                        | chr27:570,286-571,512     | 1,227      |
| Peak 15                    | After <i>FK12</i>                                          | chr27:576,797-577,749     | 953        |
| Peak 16                    | between <i>FK13</i> and <i>FK14</i>                        | chr27:591,601-592,145     | 545        |
| Peak 17                    | between <i>FK14</i> and <i>FK15</i>                        | chr27:604,262-605,772     | 1,511      |
| Peak 18                    | between <i>FK15</i> and <i>FK16</i>                        | chr27:612,634-613,737     | 1,104      |
| Peak 19                    | right after <i>FK17</i>                                    | chr27:620,337-621,819     | 1,483      |
| Peak 20                    | after <i>FK18</i>                                          | chr27:629,204-630,889     | 1,686      |
| Peak 21                    | in the middle of <i>FK18</i> & <i>FK19</i>                 | chr27:637,488-640,511     | 3,024      |
| Peak 22                    | <i>KF19</i>                                                | chr27:646,616-647,721     | 1,106      |
| Peak 23                    | a H3K27ac region located in <i>FK19-FK20</i>               | chr27:650,076-654,175     | 4,100      |
| Peak 24                    | right after <i>FK20</i>                                    | chr27:661,675-662,983     | 1,309      |
| Peak 25                    | after <i>FK21</i>                                          | chr27:671,645-672,953     | 1,180      |
| Peak 26                    | before <i>FK22</i> , no H3K4me3 signal                     | chr27:708,448-712,053     | 3,406      |
| Peak 27                    | right before <i>FK23</i>                                   | chr27:714,204-717,402     | 3,199      |
| Peak 28                    | after <i>FK24</i>                                          | chr27:725,484-729,205     | 3,622      |
| Peak 29                    | between <i>FK24</i> and <i>FK25</i>                        | chr27:733,507-738,158     | 4,217      |
| Peak 30                    | right before <i>FK26</i>                                   | chr27:760,833-763,507     | 2,575      |
| Peak 31                    | the first peak after <i>FK29</i>                           | chr27:783,391-785,135     | 1,645      |
| Peak 32                    | the second H3K27ac peak after <i>FK29</i>                  | chr27:787,227-789,785     | 2,126      |
| Peak 33                    | the third H3K27ac peak after <i>FK29</i>                   | chr27:790,366-792,110     | 1,536      |
| Peak 34                    | <i>FK30</i>                                                | chr27:798,389-800,366     | 1,978      |
| Peak 35                    | after <i>FK31</i>                                          | chr27:806,761-809,203     | 2,443      |
| Peak 36                    | <i>FK32</i>                                                | chr27:820,366-823,738     | 3,373      |
| Peak 37                    | cross <i>FK38-FK39</i> (no peak between <i>FK39-FK44</i> ) | chr27:855,715-863,971     | 8,157      |
| Peak 38                    | cross <i>FK45-FK47</i>                                     | chr27:1,037,343-1,049,203 | 11,139     |



**Table S3. Sequences of NG Capture-C probes and 3C-PCR primers. Related to Figure 3.**

| Usage                | Oligo Name                 | Oligo Sequence (5' -- 3')                                                                                                            | Modification |
|----------------------|----------------------------|--------------------------------------------------------------------------------------------------------------------------------------|--------------|
| NG Capture-C         | Capture_Peak-1_right       | GATCAGCAGGTCAACATCCTCTTCCATATGGGAAG<br>CATTTCGAGTTTGAAGCAACCCGAGAGACGCCGG<br>TGCAGGGCGGAGCCCCGGGGCGGAGCCGGCGCTG<br>CGCGTGGAGGAGGC    | 5' Biotin    |
| NG Capture-C         | Capture_Peak-18_right      | GTCCTCGAGTTCCCTTTCTCACTCTTTTCTTGCT<br>ACGAGTGCCATCCTTCAACTGACATGACCCGAGAG<br>ACGACAGAGCTACATCACGGTGACATTACGTATC<br>AAACGCCATTGGATC   | 5' Biotin    |
| NG Capture-C         | Capture_25_FK-TE_left      | GCTGAATGCCGCACATGATGGCCCCATGTGGGGG<br>TTCGCCACCAACGGTCAACAGCCCCACCCGAG<br>GCCATCCCCACCTCCACTGTGCTGCACCAGAAA<br>ATGCGTATGGAGAGA       | 5' Biotin    |
| NG Capture-C         | Capture_Peak-28_left       | GATCTGCGACAGCGCCGGGCACAGTGGGGAAACAG<br>TTCGCCACCAACGGTCAACAGCCCCACCCGAG<br>CCCCTGTACCCCTCTCGCTGGGGACACTCCAGG<br>AGGGCATCTGCTTTG      | 5' Biotin    |
| NG Capture-C         | Capture_Peak12_right       | AGTTCTCGAGTTCCCTTTCTCACTCTTTCTTGC<br>TACGAGTGCCATCCTTCAACTGACATGACCCGAGA<br>GACAACAGAGCTACATTCGCGGTGACATTACGCTAT<br>CAAACGCAATTGGATC | 5' Biotin    |
| digestion efficiency | CapSequm_Peak12_R_RV(2)_99 | GTAAAAGTCTAACATAATGAATGC                                                                                                             |              |
| digestion efficiency | DpnII-P12-FW-100           | GAAAGGAGAAATGTTTTAGTTTTAGTACTGG                                                                                                      |              |
| digestion efficiency | DpnII-P12-RV-50            | GTGTACTGTACAGGAAAACATTTGC                                                                                                            |              |
| digestion efficiency | DpnII-P19-FW-41            | CATAGAGTCATAGAATCACTCAGGTTGGAATAG                                                                                                    |              |
| digestion efficiency | DpnII-P19-RV-80            | GGATGTGATGCTCAGGGGCATG                                                                                                               |              |
| digestion efficiency | DpnII-P29-FW-40            | CAGAACCTGTAATGAAAAGCAGAGCGTTATGG                                                                                                     |              |
| digestion efficiency | DpnII-P29-RV-29            | GAGCATGGGACAGGAACCTTGATAG                                                                                                            |              |
| digestion efficiency | DpnII-P30-FW-34            | CCATCAGCTCTTACCCTGCAGAACAGCGTTG                                                                                                      |              |
| digestion efficiency | DpnII-P30-RV-110           | GCACAATGGGCACTTTCTGCCA                                                                                                               |              |
| digestion efficiency | DpnII-P33-FW-50            | TCTGCTTTGTAACCACGTGAGCCTGAAGTCC                                                                                                      |              |
| digestion efficiency | DpnII-P33-RV-82            | GTGGAAAGTCTGGCCAGATGCAAC                                                                                                             |              |
| digestion efficiency | DpnII-P34-FW-36            | CATCAGTCCCTGCCTTGACGTGCTTCTCCTTAC                                                                                                    |              |
| digestion efficiency | DpnII-P34-RV-101           | GAGTTCTGGCTCCCCCTGGGCCTTC                                                                                                            |              |
| digestion efficiency | DpnII-P35-FW-69            | CGAAATGAAATGCAGAGTAAACCAATGTAC                                                                                                       |              |
| digestion efficiency | DpnII-P35-RV-39            | CCAGGGGCATCACTTCTAGC                                                                                                                 |              |
| digestion efficiency | DpnII-P36-FW-37            | CTACAACCTCTTTTAAGGTACTTGTGGAGAAC                                                                                                     |              |
| digestion efficiency | DpnII-P36-RV-87            | CTGGTAACGTATCTGGAACACAAG                                                                                                             |              |
| digestion efficiency | DpnII-P37-FW-47            | GATGTATCTGGTATGCACTCTTTACACATC                                                                                                       |              |
| digestion efficiency | DpnII-P37-RV-29            | GTAACCTGTGGGAAGGTACTAGTAC                                                                                                            |              |
| digestion efficiency | DpnII-P38-FW-41            | CTGTCCCTAATGCTTTCTGCACCAGAGCC                                                                                                        |              |
| digestion efficiency | DpnII-P38-RV-63            | GGATAACACAGAGGCAAGGCTG                                                                                                               |              |
| digestion efficiency | DpnII-GTSF1-FW-42          | CTGCCAGGAGCAGTGATGCTTTACTAG                                                                                                          |              |
| digestion efficiency | DpnII-GTSF1-RV-49          | GGAAATCAACTTTCCATGTGGC                                                                                                               |              |
| digestion efficiency | DpnII-CINP-FW-74           | GAGCCAGAAAACAAATAAGGGTTCTCACATG                                                                                                      |              |
| digestion efficiency | DpnII-CINP-RV-75           | CTGGTGTATCTGCCATTCCTCACAG                                                                                                            |              |
| digestion efficiency | DpnII-P2-FW-75             | CCCTGAGTGGTGTCTCGGCATCCTGTGGGC                                                                                                       |              |
| digestion efficiency | DpnII-P2-RV-74             | GGCTGTCCCTCTTTTCAGACTCCTCC                                                                                                           |              |
| digestion efficiency | DpnII-P3-FW-204            | CTGTGCCTGGGGAAGGCCAGGGGAGCCAGAGCT                                                                                                    |              |
| digestion efficiency | DpnII-P3-RV-58             | GAGGGAAGACTTACCCCATCACAGTCCAACC                                                                                                      |              |
| digestion efficiency | DpnII-P4-FW-79             | GTCCAGCCTATCTGCCTTGAATCTGAACAC                                                                                                       |              |
| digestion efficiency | DpnII-P4-RV-101            | CTGGGCCAGGAATGAGTTAGTGATGGCAG                                                                                                        |              |
| digestion efficiency | DpnII-P5-FW-64             | CTCCAGTCTGGGAACAATGGTAGCTCTCTAC                                                                                                      |              |
| digestion efficiency | DpnII-P5-RV-50             | GATGGGAATGTCCCTCTCCTTTGTGCTGCGGG                                                                                                     |              |
| digestion efficiency | DpnII-P6-FW-74             | GTGACTCATGCCCAAATTCACAGCTTCTC                                                                                                        |              |
| digestion efficiency | DpnII-P6-RV-99             | CACACTCTCAGTGCCATTTCCAC                                                                                                              |              |
| digestion efficiency | DpnII-P8-FW-80             | CCTTTAAAACACTCACTGACCATGTCTTCTCTACAG                                                                                                 |              |
| digestion efficiency | DpnII-P8-RV-54             | GACATGCCATTTTCAGAAGAGACACAGACCC                                                                                                      |              |

|                      |                          |                                    |  |
|----------------------|--------------------------|------------------------------------|--|
| digestion efficiency | DpnII-P9-FW-79           | GTGGCCCATCATCCCAGTAGAAAAGTGACTGTG  |  |
| digestion efficiency | DpnII-P9-RV-101          | CCATCTCAGGTGTACAAGGTCTG            |  |
| digestion efficiency | DpnII-P13-FW-112         | GGAGGTGCCGGTCTCCTCTCCCTGTTATCTG    |  |
| digestion efficiency | DpnII-P13-RV-144         | GCTCCTCGAAGGATGCCCTG               |  |
| digestion efficiency | DpnII-P15-FW-35          | CAACAGGAGCCAAGACTTTGCCCTGGCAGCC    |  |
| digestion efficiency | DpnII-P15-RV-226         | CACGTGTCTCAGGCTCTCTCACTGGATATG     |  |
| digestion efficiency | DpnII-P16-FW-43          | CTTCTCCTACAATAAAAAGGTTTGACTTCAG    |  |
| digestion efficiency | DpnII-P16-RV-56          | CAGACATGCCGTTTCAGAGGAGAC           |  |
| digestion efficiency | DpnII-P17-FW-40          | CAGAACCTATGATGAAAAGCAGGGTATTATGG   |  |
| digestion efficiency | DpnII-P17-RV-84          | GACGCCGAAAGTAGCACTGTCC             |  |
| digestion efficiency | DpnII-P18-FW-68          | GAAAAACATCAGCACAGGAAACCAACACACTGTC |  |
| digestion efficiency | DpnII-P18-RV-74          | GCTGGCTTTTATAATGGCCCCAAG           |  |
| digestion efficiency | DpnII-P20-FW-102         | CCATCAGTCCCCTGCCTTGATGTATTTCTCCT   |  |
| digestion efficiency | DpnII-P20-RV-27          | CTTTGCTGGGCTTCCCCCG                |  |
| digestion efficiency | DpnII-P21-FW-100         | CCTCCTAAAAGGATGAAGATTCACACAAGC     |  |
| digestion efficiency | DpnII-P21-RV-30          | CAGTAATGGACAAAGTCCCTTTAC           |  |
| digestion efficiency | DpnII-P22-FW-100         | CCTACCAAAAATGAGGTCTCCCTTTAAAAC     |  |
| digestion efficiency | DpnII-P22-RV-29          | GCCTCTGGATATTGGGGAGAAAAG           |  |
| digestion efficiency | DpnII-P24-FW-72          | CTTCTGAGGAGCCTAAAATGTGCTCTTTTG     |  |
| digestion efficiency | DpnII-P24-RV-28          | GCAGTGACCATGAACCTGTGCATC           |  |
| digestion efficiency | DpnII-P27-FW-105         | CTGGTCTTCTCTCTGGTATCTGATGACAG      |  |
| digestion efficiency | DpnII-P27-RV-137         | GATGGATGGCCTGGGGTTTG               |  |
| 3C-PCR               | Hind3-CINP-FW-68         | GCAGCACCCATCACTTGCC                |  |
| digestion efficiency | Hind3-CINP-RV-73         | CATTGTCAAACAGGACTGGAC              |  |
| 3C-PCR               | Hind3-GTSF1-FW-104       | CCAACCCAAGCCATTCTATAATTCTAGAG      |  |
| digestion efficiency | Hind3-GTSF1-RV-52        | GGGTCACTATAAGTGCTGAAAATCAAAG       |  |
| 3C-PCR               | Hind3-K42-FW-53          | GATCAGAAGGTAATGTGGGAGGAAATAC       |  |
| digestion efficiency | Hind3-K42-RV-51          | GCTTTTGAGTGGATGCAAGGGC             |  |
| 3C-PCR               | Hind3-P2-FW-53           | GGTGAGGCACAAGCAAAAGCC              |  |
| digestion efficiency | Hind3-P2-RV-82           | GGTCCCCTGGGAGACTTGG                |  |
| 3C-PCR               | Hind3-P4+25-RV(2)-90+93  | GTCCAACCTGCCATGCTGAAGC             |  |
| 3C-PCR               | Hind3-P4-FW-27           | GCAGAGCACTGGAACCAGC                |  |
| 3C-PCR               | Hind3-P6-FW-123          | GTGCACATCAGCTTATATTCTAACTTACG      |  |
| digestion efficiency | Hind3-P6-RV(3)-129       | GTCCAACATCTGTCAACACTGACACGC        |  |
| digestion efficiency | Hind3-P7+19-RV(2)-70     | GGATGACACCAAGTTTAGTGGTGC           |  |
| 3C-PCR               | Hind3-P7-FW-36           | GTTGAACCTCATTAGGTTTCATAACGG        |  |
| 3C-PCR               | Hind3-P8-FW-23           | GGTTGCCAGCTTGGAGAAC                |  |
| digestion efficiency | Hind3-P8-RV-56           | CCTCCCCTCTGTCTCTCCCTC              |  |
| 3C-PCR               | Hind3-P9-FW(2)-203       | CACTTCTTCCACAGACACAGGC             |  |
| digestion efficiency | Hind3-P9-RV(2)-62        | GGCTGTTTCCACTTACACAGCC             |  |
| 3C-PCR               | Hind3-P11+17-RV(3)-47    | CTGCTTTCCCTGCACAGGAC               |  |
| 3C-PCR               | Hind3-P11-FW-23          | GGTTGCCAGCTTGGAGAAG                |  |
| 3C-PCR               | Hind3-P12-FW-153-92      | CGAGGAAGGCAGCGGAGC                 |  |
| digestion efficiency | Hind3-P12-RV-55          | CTCCCCTCTTCTTTCCCTGCAC             |  |
| 3C-PCR               | Hind3-P13-FW-26          | CAGGGCATCCTTCGAGGAGC               |  |
| digestion efficiency | Hind3-P13-RV-83          | CTCTAGGAAACCTGTTCCTACTG            |  |
| 3C-PCR               | Hind3-P15-FW-57          | GGCATAATCCAGTGAGGAGAGCC            |  |
| digestion efficiency | Hind3-P15-RV-26          | GTTGTAGAGAGCAAAGAGGTGCC            |  |
| 3C-PCR               | Hind3-P17-FW-24          | GGGTTGCCAGCTTGGAGAG                |  |
| digestion efficiency | Hind3-P18+20-RV(2)-56    | CCTCCCCTCTTCTTTCCCTCC              |  |
| 3C-PCR               | Hind3-P18-FW(2)-27       | CGTGGGTTGTCCAGCTTGG                |  |
| 3C-PCR               | Hind3-P19-FW-45          | CTTGGCCTTGTGAACCTCATTTG            |  |
| 3C-PCR               | Hind3-P20-FW-24          | GGGTTGTCCAGCTTGAAGAAGC             |  |
| 3C-PCR               | Hind3-P21-FW-99          | CTTACGTTACATATGCAAACTCATG          |  |
| 3C-PCR               | Hind3-P24-FW-43          | GTTTTCTAAACAAATTCAGGGCATCC         |  |
| digestion efficiency | Hind3-P24-RV-112         | CACTGACACACATGGGTCATCAC            |  |
| 3C-PCR               | Hind3-P25-FW-51          | CATCTTCAGTGTGAGTGTGAAGAGC          |  |
| digestion efficiency | Hind3-P27+21-RV(5)-67+67 | CCACTGTTTGACCACCTTCATATTCAAC       |  |

|                      |                           |                              |  |
|----------------------|---------------------------|------------------------------|--|
| 3C-PCR               | Hind3-P27-FW-45           | CTGTTTTCTAAACAAACCCAGGCC     |  |
| 3C-PCR               | Hind3-P29-FW(2)-118       | GGTGTCAGGGTGCTTAATAGC        |  |
| digestion efficiency | Hind3-P29-RV-49           | CTCTGCTTTCTCTCCGAGG          |  |
| 3C-PCR               | Hind3-P32-FW-30           | CTGAGGCCTCTAATCCTAACACTC     |  |
| digestion efficiency | Hind3-P32-RV(2)-51        | CTTACACGGCCTTGCCATTTTC       |  |
| 3C-PCR               | Hind3-P34-FW-50           | CCTGTGAGGAGAGCTTGAGG         |  |
| digestion efficiency | Hind3-P34-RV-52           | CCTCTGTGCTTTCCCTCTTTGG       |  |
| 3C-PCR               | Hind3-P35-FW-27           | CATTAGGTTCTCATGGGCCCC        |  |
| digestion efficiency | Hind3-P35-RV-51           | GGTGCATGGAATGCAACAGAAG       |  |
| 3C-PCR               | Hind3-P36-FW-50           | GAGAGCTGAAGTCTCTCTCTGTC      |  |
| digestion efficiency | Hind3-P36-RV-70           | GTAACTAGCATTAAGACAGTGGTAATGG |  |
| 3C-PCR               | Hind3-P37-FW-50           | GGCCTGACGTCAATAGACGTC        |  |
| digestion efficiency | Hind3-P37-RV-50           | CTCCAGGCTAAATCTTCTGCCC       |  |
| 3C-PCR               | Hind3-P38-FW-50           | CTCATCATGGGACAAATAAGCCTAACG  |  |
| digestion efficiency | Hind3-P38-RV-50           | GAAAAATTGGAGCTTTCAGTATGTCCC  |  |
| ChIP-qPCR            | CTCF Peak flanks FK-TE-FW | GAGACAAGCAGTGCATGGATAG       |  |
| ChIP-qPCR            | CTCF Peak flanks FK-TE-RV | GAATGGTGCCTCCCTTATCC         |  |
| ChIP-qPCR            | FK-TE-FW                  | CATATATCCGTCACCTGAAGTCCTC    |  |
| ChIP-qPCR            | FK-TE-RV                  | CAGGTAAGCGGAGGAACAG          |  |
| ChIP-qPCR            | Site-1-FW                 | CTTGAAAGCAACCGCTAAAG         |  |
| ChIP-qPCR            | Site-2_RV                 | CAGGTGCTGGAAGACTTTTACC       |  |
| ChIP-qPCR            | Site-5-FW                 | CCCTGCCAGGTTTCGGTAC          |  |
| ChIP-qPCR            | Site-5_RV                 | CAGCGAGGGCATCTACTG           |  |
| ChIP-qPCR            | Site-7-FW                 | GTCCTTGAGACCGGGCCG           |  |
| ChIP-qPCR            | Site-7_RV                 | CAGACTCCACGGAGGTGC           |  |
| ChIP-qPCR            | Site-9-FW                 | GTTGCACCTGGGCTTTGC           |  |
| ChIP-qPCR            | Site-9_RV                 | GCATCACTCTCCGTTCTGCATG       |  |
| ChIP-qPCR            | Site-13-FW                | CTGGAACGCATTACTCCGG          |  |
| ChIP-qPCR            | Site-13_RV                | CAGGGGGCGCTGCTGCTC           |  |
| ChIP-qPCR            | Site-21-FW                | CATGTCAGCAGTATCAGCTCGGGCG    |  |
| ChIP-qPCR            | Site-21_RV                | CTTTGGGCGGGCGGTGG            |  |
| ChIP-qPCR            | Site-24-FW                | CTCAGTGAATCACTACTGCGTATGC    |  |
| ChIP-qPCR            | Site-24_RV                | CGGGGGTACAGTGCCGTC           |  |



**Table S4. Quality control of omic data, including RNA-seq, ChIP-seq, and NG Capture-C. Related to Figures 1-3.****Table S4.1. Quality control of RNA-seq. Related to Figures 1 and 2.**

| Sample ID  | Group                        | Stage | Total Reads | Mapping % | Sequencing Depth (LN/G) |
|------------|------------------------------|-------|-------------|-----------|-------------------------|
| Chuong-1   | dorsal back skin             | E7    | 22,078,251  | 90.99%    | 1.38                    |
| Chuong-13  | dorsal back skin             | E7    | 27,106,148  | 91.10%    | 1.69                    |
| Chuong-29  | dorsal feather epidermis     | E9    | 33,555,295  | 90.67%    | 2.1                     |
| Chuong-33  | dorsal feather epidermis     | E9    | 27,243,786  | 90.95%    | 1.7                     |
| Chuong-86  | dorsal feather filament base | E14   | 30,907,669  | 92.95%    | 1.93                    |
| Chuong-187 | dorsal feather filament base | E14   | 29,565,041  | 93.82%    | 1.85                    |
| Chuong-386 | dorsal feather filament base | E14   | 35,514,832  | 89.76%    | 2.22                    |
| Chuong-387 | dorsal feather filament base | E14   | 39,771,479  | 89.71%    | 2.49                    |
| Chuong-31  | leg scale epidermis          | E9    | 31,129,252  | 90.93%    | 1.95                    |
| Chuong-87  | leg scale epidermis          | E14   | 33,027,593  | 91.83%    | 2.06                    |
| Chuong-188 | leg scale epidermis          | E14   | 32,013,585  | 92.87%    | 2                       |

**Table S4.2. Quality control of ChIP-seq. Related to Figures 1 and 2.**

| Sample ID | Stage | Regions          | Antibody     | Total Reads | Mapping % | Sequencing Depth (LN/G) |
|-----------|-------|------------------|--------------|-------------|-----------|-------------------------|
| ChIP-31   | E7    | dorsal back skin | gDNA         | 24,646,232  | 97.86%    | 1.7                     |
| ChIP-25   | E7    | dorsal back skin | anti-H3K27ac | 21,278,193  | 91.29%    | 1.37                    |
| ChIP-51   | E7    | dorsal back skin | anti-H3K27ac | 21,193,480  | 97.15%    | 1.45                    |
| ChIP-15   | E9    | feather skin     | gDNA         | 21,457,662  | 97.84%    | 1.48                    |
| ChIP-1    | E9    | feather skin     | anti-H3K27ac | 30,296,497  | 93.50%    | 1.99                    |
| ChIP-11   | E9    | feather skin     | anti-H3K27ac | 20,573,865  | 94.66%    | 1.37                    |
| ChIP-32   | E9    | scale skin       | gDNA         | 18,095,139  | 97.89%    | 1.25                    |
| ChIP-26   | E9    | scale skin       | anti-H3K27ac | 21,583,440  | 90.85%    | 1.38                    |
| ChIP-52   | E9    | scale skin       | anti-H3K27ac | 21,259,710  | 96.49%    | 1.44                    |
| ChIP-21   | E14   | feather skin     | gDNA         | 26,190,250  | 97.30%    | 1.79                    |
| ChIP-19   | E14   | feather skin     | anti-H3K27ac | 22,367,997  | 76.47%    | 1.2                     |
| ChIP-33   | E14   | feather skin     | anti-H3K27ac | 18,295,996  | 93.62%    | 1.21                    |
| ChIP-20   | E14   | scale skin       | gDNA         | 21,680,839  | 96.37%    | 1.47                    |
| ChIP-34   | E14   | scale skin       | anti-H3K27ac | 22,638,290  | 93.19%    | 1.49                    |
| ChIP-22   | E14   | scale skin       | anti-H3K27ac | 18,747,984  | 81.88%    | 1.08                    |
| ChIP-223  | E14   | feather skin     | gDNA         | 49,667,530  | 98.25%    | 3.05                    |
| ChIP-228  | E14   | feather skin     | anti-IgG     | 32,447,629  | 94.83%    | 2.17                    |
| ChIP-232  | E14   | feather skin     | anti-IgG     | 28,719,165  | 93.81%    | 1.9                     |
| ChIP-225  | E14   | feather skin     | anti-CTCF    | 29,408,371  | 89.74%    | 1.86                    |
| ChIP-236  | E14   | feather skin     | anti-CTCF    | 14,372,678  | 91.24%    | 0.92                    |
| ChIP-234  | E14   | scale skin       | gDNA         | 43,540,970  | 96.07%    | 2.61                    |
| ChIP-235  | E14   | scale skin       | anti-IgG     | 18,196,106  | 95.21%    | 1.22                    |
| ChIP-241  | E14   | scale skin       | anti-IgG     | 17,559,080  | 95.38%    | 1.18                    |
| ChIP-229  | E14   | scale skin       | anti-CTCF    | 30,561,208  | 89.01%    | 1.91                    |
| ChIP-242  | E14   | scale skin       | anti-CTCF    | 18,802,089  | 81.29%    | 1.08                    |
| ChIP-226  | E14   | feather skin     | anti-KLF4    | 29,700,399  | 85.51%    | 1.79                    |
| ChIP-237  | E14   | feather skin     | anti-KLF4    | 13,819,214  | 79.91%    | 0.78                    |
| ChIP-230  | E14   | scale skin       | anti-KLF4    | 32,066,777  | 83.07%    | 1.96                    |
| ChIP-243  | E14   | scale skin       | anti-KLF4    | 16,079,004  | 81.74%    | 0.93                    |
| ChIP-227  | E14   | feather skin     | anti-H3K4me1 | 57,175,979  | 91.49%    | 3.68                    |
| ChIP-238  | E14   | feather skin     | anti-H3K4me1 | 152,404,558 | 88.44%    | 9.49                    |
| ChIP-231  | E14   | scale skin       | anti-H3K4me1 | 55,875,862  | 91.48%    | 3.6                     |
| ChIP-244  | E14   | scale skin       | anti-H3K4me1 | 111,488,400 | 87.62%    | 6.87                    |
| ChIP-73   | E14   | feather skin     | anti-H3K4me3 | 20,067,127  | 77.35%    | 1.09                    |
| ChIP-74   | E14   | scale skin       | anti-H3K4me3 | 22,762,971  | 76.83%    | 1.23                    |

**Table S4.3. Quality control of NG Capture-C. Related to Figure 3.**

| Sample ID | Stage-Region                         | Total number of reads entering the analysis | Capture-containing reads entering the analysis | Actual reported fragments | Paired-end |
|-----------|--------------------------------------|---------------------------------------------|------------------------------------------------|---------------------------|------------|
| dCAP1     | E14 non-keratinized feather filament | 79,105,609                                  | 25,709,833                                     | 92,496                    | 40-PE      |
| dCAP-2-1  | E7 whole brain                       | 44,781,641                                  | 4,023,584                                      | 55,716                    | 75-PE      |
| dCAP-2-2  | E7 whole brain                       | 50,505,262                                  | 4,348,962                                      | 56,494                    | 75-PE      |
| dCAP-2-3  | E7 dorsal back skin epidermis        | 30,160,644                                  | 2,327,254                                      | 37,668                    | 75-PE      |
| dCAP-2-4  | E7 dorsal back skin epidermis        | 45,350,463                                  | 4,126,177                                      | 40,321                    | 75-PE      |
| dCAP-2-5  | E14 whole brain                      | 52,019,460                                  | 4,420,350                                      | 58,199                    | 75-PE      |
| dCAP-2-6  | E14 whole brain                      | 50,669,020                                  | 4,261,090                                      | 56,426                    | 75-PE      |
| dCAP-2-7  | E14 non-keratinized feather filament | 46,521,279                                  | 4,227,767                                      | 82,890                    | 75-PE      |
| dCAP-2-8  | E14 non-keratinized feather filament | 40,611,452                                  | 2,888,175                                      | 40,227                    | 75-PE      |
| dCAP-2-9  | E14 leg scale skin epidermis         | 47,013,349                                  | 4,700,417                                      | 33,862                    | 75-PE      |
| dCAP-2-10 | E14 leg scale skin epidermis         | 36,038,572                                  | 3,600,577                                      | 19,511                    | 75-PE      |
| dCAP-2-11 | adult wing feather barb branch       | 38,350,547                                  | 3,616,525                                      | 27,793                    | 75-PE      |
| dCAP-2-12 | adult wing feather barb branch       | 38,559,293                                  | 3,767,165                                      | 26,709                    | 75-PE      |
| dCAP-2-13 | adult dorsal feather barb branch     | 33,161,297                                  | 2,566,443                                      | 10,364                    | 75-PE      |
| dCAP-2-14 | adult dorsal feather barb branch     | 29,729,411                                  | 2,635,274                                      | 9,126                     | 75-PE      |

**Table S5. Summary of NG Capture-C interactions. Related to Figure 3. P#-P#, selected H3K27ac bait Peak # interacts target Peak #.**

| Tissue                                                            | Captured Read >1000         | Captured Read >100                                                                                                        | Captured Read >20 | Tissue                                                            | Captured Read >1000                    | Captured Read >100                                                                                                  | Captured Read >20 |
|-------------------------------------------------------------------|-----------------------------|---------------------------------------------------------------------------------------------------------------------------|-------------------|-------------------------------------------------------------------|----------------------------------------|---------------------------------------------------------------------------------------------------------------------|-------------------|
| <b>E7 brain</b><br><br>dCAP2-1<br>+<br>dCAP2-2                    | P1-P10<br>P12-P6<br>P28-P27 | P1-P2<br>P12-P3<br>P12-P20<br>P18-P3<br>P18-P5<br>P18-P6<br>P18-P15<br>P18-P20<br>P28-P4<br>P28-P14<br>P28-P25<br>P28-P30 | P1-P1             | <b>E14 feather</b><br><br>dCAP2-7<br>+<br>dCAP2-8                 | P1-P10<br>P12-P6<br>P28-P27            | P1-P2<br>P12-P3<br>P12-P15<br>P12-P20<br>P18-P3<br>P18-P6<br>P18-P15<br>P18-P20<br>P28-P14<br>P28-P25<br>P28-P30    | P1-P1             |
|                                                                   |                             |                                                                                                                           | P1-P3             |                                                                   |                                        |                                                                                                                     | P1-P3             |
|                                                                   |                             |                                                                                                                           | P1-P5             |                                                                   |                                        |                                                                                                                     | P1-P5             |
|                                                                   |                             |                                                                                                                           | P1-P7             |                                                                   |                                        |                                                                                                                     | P1-P7             |
|                                                                   |                             |                                                                                                                           | P1-P17            |                                                                   |                                        |                                                                                                                     | P1-P19            |
|                                                                   |                             |                                                                                                                           | P1-P19            |                                                                   |                                        |                                                                                                                     | P1-P21            |
|                                                                   |                             |                                                                                                                           | P1-P20            |                                                                   |                                        |                                                                                                                     | P1-P33            |
|                                                                   |                             |                                                                                                                           | P1-P21            |                                                                   |                                        |                                                                                                                     | P12-P5            |
|                                                                   |                             |                                                                                                                           | P1-P27            |                                                                   |                                        |                                                                                                                     | P12-P12           |
|                                                                   |                             |                                                                                                                           | P1-P33            |                                                                   |                                        |                                                                                                                     | P12-P19           |
|                                                                   |                             |                                                                                                                           | P12-P5            |                                                                   |                                        |                                                                                                                     | P12-P24           |
|                                                                   |                             |                                                                                                                           | P12-P11           |                                                                   |                                        |                                                                                                                     | P18-P5            |
|                                                                   |                             |                                                                                                                           | P12-P12           |                                                                   |                                        |                                                                                                                     | P18-P8            |
|                                                                   |                             |                                                                                                                           | P12-P15           |                                                                   |                                        |                                                                                                                     | P18-P9            |
|                                                                   |                             |                                                                                                                           | P12-P19           |                                                                   |                                        |                                                                                                                     | P18-P12           |
|                                                                   |                             |                                                                                                                           | P12-P24           |                                                                   |                                        |                                                                                                                     | P18-P18           |
|                                                                   |                             |                                                                                                                           | P18-P8            |                                                                   |                                        |                                                                                                                     | P18-P19           |
|                                                                   |                             |                                                                                                                           | P18-P9            |                                                                   |                                        |                                                                                                                     | P18-P24           |
|                                                                   |                             |                                                                                                                           | P18-P11           |                                                                   |                                        |                                                                                                                     | P28-P1            |
| P18-P12                                                           | P28-P4                      |                                                                                                                           |                   |                                                                   |                                        |                                                                                                                     |                   |
| P18-P18                                                           | P28-P9                      |                                                                                                                           |                   |                                                                   |                                        |                                                                                                                     |                   |
| P18-P19                                                           | P28-P29                     |                                                                                                                           |                   |                                                                   |                                        |                                                                                                                     |                   |
| P18-P24                                                           |                             |                                                                                                                           |                   |                                                                   |                                        |                                                                                                                     |                   |
| P18-P31                                                           |                             |                                                                                                                           |                   |                                                                   |                                        |                                                                                                                     |                   |
| P28-P1                                                            |                             |                                                                                                                           |                   |                                                                   |                                        |                                                                                                                     |                   |
| P28-P3                                                            |                             |                                                                                                                           |                   |                                                                   |                                        |                                                                                                                     |                   |
| P28-P29                                                           |                             |                                                                                                                           |                   |                                                                   |                                        |                                                                                                                     |                   |
| <b>E7 epidermis</b><br><br>dCAP2-3<br>+<br>dCAP2-4                | P1-P10<br>P12-P6            | P1-P2<br>P12-P3<br>P18-P3<br>P18-P6<br>P28-P27<br>P28-P30                                                                 | P1-P1             | <b>E14 scale epidermis</b><br><br>dCAP2-9<br>+<br>dCAP2-10        | P1-P10<br>P12-P6<br>P12-P15<br>P18-P15 | P12-P12<br>P12-P18<br>P12-P22<br>P18-P3<br>P18-P6<br>P18-P12<br>P18-P18<br>P18-P20<br>P28-P27<br>P28-P30<br>P34-P34 | P1-P1             |
|                                                                   |                             |                                                                                                                           | P1-P3             |                                                                   |                                        |                                                                                                                     | P1-P2             |
|                                                                   |                             |                                                                                                                           | P1-P4             |                                                                   |                                        |                                                                                                                     | P1-P4             |
|                                                                   |                             |                                                                                                                           | P1-P7             |                                                                   |                                        |                                                                                                                     | P1-P21            |
|                                                                   |                             |                                                                                                                           | P1-P12            |                                                                   |                                        |                                                                                                                     | P12-P3            |
|                                                                   |                             |                                                                                                                           | P1-P19            |                                                                   |                                        |                                                                                                                     | P12-P9            |
|                                                                   |                             |                                                                                                                           | P1-P21            |                                                                   |                                        |                                                                                                                     | P12-P19           |
|                                                                   |                             |                                                                                                                           | P12-P5            |                                                                   |                                        |                                                                                                                     | P12-P20           |
|                                                                   |                             |                                                                                                                           | P12-P15           |                                                                   |                                        |                                                                                                                     | P12-P24           |
|                                                                   |                             |                                                                                                                           | P12-P19           |                                                                   |                                        |                                                                                                                     | P18-P8            |
|                                                                   |                             |                                                                                                                           | P12-P20           |                                                                   |                                        |                                                                                                                     | P18-P22           |
|                                                                   |                             |                                                                                                                           | P12-P24           |                                                                   |                                        |                                                                                                                     | P18-P24           |
|                                                                   |                             |                                                                                                                           | P18-P5            |                                                                   |                                        |                                                                                                                     | P28-P1            |
|                                                                   |                             |                                                                                                                           | P18-P7            |                                                                   |                                        |                                                                                                                     | P28-P14           |
|                                                                   |                             |                                                                                                                           | P18-P15           |                                                                   |                                        |                                                                                                                     | P28-P25           |
|                                                                   |                             |                                                                                                                           | P18-P18           |                                                                   |                                        |                                                                                                                     | P28-P29           |
|                                                                   |                             |                                                                                                                           | P18-P19           |                                                                   |                                        |                                                                                                                     |                   |
|                                                                   |                             |                                                                                                                           | P18-P20           |                                                                   |                                        |                                                                                                                     |                   |
|                                                                   |                             |                                                                                                                           | P18-P24           |                                                                   |                                        |                                                                                                                     |                   |
| P28-P1                                                            |                             |                                                                                                                           |                   |                                                                   |                                        |                                                                                                                     |                   |
| P28-P4                                                            |                             |                                                                                                                           |                   |                                                                   |                                        |                                                                                                                     |                   |
| P28-P14                                                           |                             |                                                                                                                           |                   |                                                                   |                                        |                                                                                                                     |                   |
| P28-P25                                                           |                             |                                                                                                                           |                   |                                                                   |                                        |                                                                                                                     |                   |
| chr25-FK-TE-<br>chr25Ktn                                          |                             |                                                                                                                           |                   |                                                                   |                                        |                                                                                                                     |                   |
| <b>Adult wing feather branch</b><br><br>dCAP2-11<br>+<br>dCAP2-12 | P1-P10<br>P12-P6            | P1-P2<br>P12-P12<br>P12-P15<br>P18-P6<br>P18-P12<br>P18-P15<br>P18-P18<br>P28-P27<br>P34-P34                              | P1-P1             | <b>Adult wing feather branch</b><br><br>dCAP2-11<br>+<br>dCAP2-12 | P1-P10<br>P12-P6                       | P1-P2<br>P12-P12<br>P12-P15<br>P18-P6<br>P18-P12<br>P18-P15<br>P18-P18<br>P28-P27<br>P34-P34                        | P1-P1             |
|                                                                   |                             |                                                                                                                           | P1-P21            |                                                                   |                                        |                                                                                                                     | P1-P21            |
|                                                                   |                             |                                                                                                                           | P12-P20           |                                                                   |                                        |                                                                                                                     | P12-P20           |
|                                                                   |                             |                                                                                                                           | P12-P22           |                                                                   |                                        |                                                                                                                     | P12-P22           |
|                                                                   |                             |                                                                                                                           | P12-P24           |                                                                   |                                        |                                                                                                                     | P12-P24           |
|                                                                   |                             |                                                                                                                           | P18-P3            |                                                                   |                                        |                                                                                                                     | P18-P3            |
|                                                                   |                             |                                                                                                                           | P18-P5            |                                                                   |                                        |                                                                                                                     | P18-P5            |
|                                                                   |                             |                                                                                                                           | P18-P20           |                                                                   |                                        |                                                                                                                     | P18-P20           |
|                                                                   |                             |                                                                                                                           | P18-P24           |                                                                   |                                        |                                                                                                                     | P18-P24           |
|                                                                   |                             |                                                                                                                           | P28-P14           |                                                                   |                                        |                                                                                                                     | P28-P14           |
|                                                                   |                             |                                                                                                                           | P28-P25           |                                                                   |                                        |                                                                                                                     | P28-P25           |
|                                                                   |                             |                                                                                                                           | P28-P29           |                                                                   |                                        |                                                                                                                     | P28-P29           |
| P28-P30                                                           | P28-P30                     |                                                                                                                           |                   |                                                                   |                                        |                                                                                                                     |                   |



**Continued**

| Tissue                                          | Captured Read >1000         | Captured Read >100                                                                        | Captured Read >20                                                                                                                                                                                                            | Tissue                                                              | Captured Read >1000 | Captured Read >100                                                                  | Captured Read >20            |
|-------------------------------------------------|-----------------------------|-------------------------------------------------------------------------------------------|------------------------------------------------------------------------------------------------------------------------------------------------------------------------------------------------------------------------------|---------------------------------------------------------------------|---------------------|-------------------------------------------------------------------------------------|------------------------------|
| <b>E14 brain</b><br><br>dCAP2-5<br>+<br>dCAP2-6 | P1-P10<br>P12-P6<br>P28-P27 | P1-P1<br>P1-P2<br>P12-P20<br>P18-P6<br>P18-P20<br>P28-P4<br>P28-P14<br>P28-P25<br>P28-P30 | P1-P4<br>P1-P5<br>P1-P7<br>P1-P11<br>P1-P19<br>P1-P21<br>P1-P27<br>P1-P33<br>P12-P3<br>P12-P5<br>P12-P12<br>P12-P24<br>P18-P3<br>P18-P5<br>P18-P11<br>P18-P18<br>P18-P19<br>P18-P24<br>P28-P1<br>P28-P3<br>P28-P9<br>P28-P29 | <b>Adult dorsal feather branch</b><br><br>dCAP2-13<br>+<br>dCAP2-14 | P1-P10              | P12-P6<br>P12-P12<br>P12-P15<br>P18-P12<br>P18-P15<br>P18-P18<br>P28-P27<br>P34-P34 | P18-P6<br>P18-P24<br>P28-P30 |

**Table S7. Bioinformatic analysis pipelines including software for manuscript preparation. Related to the STAR Methods, Bioinformatic Analysis.**

**Table S7.1. General analysis.**

| Process                                              | Tool ID            | Version                  | Tool Parameter<br>(only shows custom options used in this work)          |
|------------------------------------------------------|--------------------|--------------------------|--------------------------------------------------------------------------|
| <b>QC</b>                                            | FastQC             | Galaxy Version 0.72      |                                                                          |
|                                                      | Qualimap           | Version 2                |                                                                          |
| <b>Calculation of correlation between replicates</b> | multiBigwigSummary | Galaxy Version 3.1.2.0.0 | --outRawCounts Yes                                                       |
|                                                      | plotCorrelation    | Galaxy Version 3.1.2.0.0 | --whatToPlot Heatmap<br>Save the matrix of values underlying the heatmap |

**Table S7.2. RNA-seq analysis.**

| Process                                       | Tool ID                  | Version                  | Tool Parameter<br>(only shows custom options used in this work)                                                                                                    | Order |
|-----------------------------------------------|--------------------------|--------------------------|--------------------------------------------------------------------------------------------------------------------------------------------------------------------|-------|
| <b>Manipulation</b>                           | fastq_groomer            | Galaxy Version 1.1.1     | default                                                                                                                                                            | 1     |
|                                               | fastq_trimmer_by_quality | Galaxy Version 1.1.1     | Window size 3; min score >= 20                                                                                                                                     | 2     |
| <b>Mapping</b>                                | tophat2                  | Galaxy Version 2.1.1     | Genome: UCSC galGal4                                                                                                                                               | 3     |
| <b>Quantification</b>                         | Cufflinks                | Galaxy Version 2.2.1.2   | default                                                                                                                                                            | 4     |
|                                               | Cuffmerge                | Galaxy Version 2.2.1.1   | default                                                                                                                                                            | 5     |
|                                               | Cuffquant                | Galaxy Version 2.2.1.1   | default                                                                                                                                                            | 6     |
| <b>Differentially expressed gene analysis</b> | Cuffdiff                 | Galaxy Version 2.2.1.3   | default                                                                                                                                                            | 7     |
|                                               | deeptools_bam_coverage   | Galaxy Version 3.1.2.0.0 | default                                                                                                                                                            | A8-1  |
| <b>Convert Formats</b>                        | wig_to_bigWig            | Galaxy Version 1.1.1     | default                                                                                                                                                            | A9    |
| <b>Graph/Display Data</b>                     | pyGenomeTracks           | 2.0                      | \$ make_tracks_file --trackFiles input.bigwig -o config.ini<br>\$ pyGenomeTracks --tracks config.ini --region chr27:chr27:4500721-4700799 --outFileName figure.pdf | A10   |
| <b>Enriched pathway analysis</b>              | IPA                      | 01-12                    |                                                                                                                                                                    | B8-2  |
|                                               | PGS                      | 6.6                      |                                                                                                                                                                    | B8-3  |

**Table S7.3. Manuscript preparation.**

| Process                                                                                   | Tool ID                        | Version                   | Tool Parameter<br>(only shows custom options used in this work)                                                                                                                                     | Price  |
|-------------------------------------------------------------------------------------------|--------------------------------|---------------------------|-----------------------------------------------------------------------------------------------------------------------------------------------------------------------------------------------------|--------|
| <b>Visualization</b>                                                                      | UCSC Genome Browser            |                           |                                                                                                                                                                                                     | free   |
|                                                                                           | pyGenomeTracks                 | 2.0                       | Commands (example):<br>\$ make_tracks_file --trackFiles input.bigwig -o config.ini<br>\$ pyGenomeTracks --tracks config.ini --region chr27:chr27:4500721-4700799 --outFileName output.pdf           | free   |
|                                                                                           | IGV                            | 2.4.15                    |                                                                                                                                                                                                     | free   |
|                                                                                           | GraphPad Prism                 | version 7.0a for Mac OS X | Generate charts and plots                                                                                                                                                                           | \$\$\$ |
| <b>Figure Arrangement</b>                                                                 | OmniGraffle                    | 7.8.2                     | 1) arrange each figure containing multiple panels in a canvas<br>2) export each figure into a high quality TIFF file (600 dpi)                                                                      | \$\$   |
| <b>Compile PDF</b><br>(Generate a high-resolution but small-size PDF file for submission) | Microsoft Word for Mac         | 15.13.4                   | 1) import each figure TIFF file on one page<br>2) File > Reduce File Size > select Print (220 ppi) and check Delete cropped areas of pictures > OK<br>3) File > Save As > select File Format as PDF | \$\$\$ |
|                                                                                           | Preview (Mac default software) |                           | Merge figure PDF with main text PDF and Save                                                                                                                                                        | free   |
|                                                                                           | PDF Expert (the best!)         | Version 2.4.22 (611)      | It can direct reduce file size of OmniGraffle output PDF with good resolution.                                                                                                                      | \$     |

Table S7.4. ChIP-seq analysis. Related to the STAR Methods, Bioinformatic Analysis.

| Process                                          | Tool ID                  | Version                     | Tool Parameter<br>(only shows custom options used in this work)                                                                                                                                                                                                                                                                                                                                               | Order |
|--------------------------------------------------|--------------------------|-----------------------------|---------------------------------------------------------------------------------------------------------------------------------------------------------------------------------------------------------------------------------------------------------------------------------------------------------------------------------------------------------------------------------------------------------------|-------|
| Manipulation                                     | fastq_groomer            | Galaxy Ver 1.1.1            | default                                                                                                                                                                                                                                                                                                                                                                                                       | 1     |
|                                                  | fastq_quality_filter     | Galaxy Ver 1.0.2            | default                                                                                                                                                                                                                                                                                                                                                                                                       | 2     |
|                                                  | fastq_trimmer_by_quality | Galaxy Ver 1.1.1            | Window size 3; min score >= 20                                                                                                                                                                                                                                                                                                                                                                                | 3     |
| Mapping                                          | bowtie2                  | Galaxy Ver 2.3.4.2          | Genome: UCSC galGal4<br>--very-sensitive<br>Save the bowtie2 mapping statistics to the history Yes                                                                                                                                                                                                                                                                                                            | 4     |
| Filtering                                        | samtool_filter2          | Galaxy Ver 1.8              | -q 1                                                                                                                                                                                                                                                                                                                                                                                                          | 5     |
|                                                  | samtools_sort            | Galaxy Ver 2.0.1            | default                                                                                                                                                                                                                                                                                                                                                                                                       | 6     |
|                                                  | samtools_rmdup           | Galaxy Ver 1.0.1            | BAM is single-end                                                                                                                                                                                                                                                                                                                                                                                             | 7     |
| Peak-calling and normalization                   | macs2                    | Galaxy Ver 2.1.1.20160309.4 | <b># for H3K27ac-ChIP</b><br>--gsize 1065365425<br>--nomodel --extsize 147<br>Additional Outputs --bdg<br>Advanced Options --broad --broad-cutoff 0.1<br><br><b># for CTCF-/KLF4-/SATB-ChIP</b><br>--gsize 1065365425<br>--nomodel --extsize (value obtained from macs2 predictd tool: CTCF=205; KLF=160; SATB=257)<br>Additional Outputs --bdg<br>Advance options (only for SATB) --broad --broad-cutoff 0.1 | A8    |
|                                                  | macs2_bdgcmp             | Galaxy Ver 2.1.1.20160309.0 | Two executions for one comparison:<br>1) -m FE<br>2) -m logLR -p 0.00001                                                                                                                                                                                                                                                                                                                                      | A9    |
| Convert Formats                                  | wig_to_bigWig            | Galaxy Ver 1.1.1            | default                                                                                                                                                                                                                                                                                                                                                                                                       | A10   |
| Graph/Display Data                               | pyGenomeTracks           | 2.0                         | \$ make_tracks_file --trackFiles input.bigwig -o config.ini<br>\$ pyGenomeTracks --tracks config.ini --region displayed-ex-chr27:chr27:4500721-4700799 --outFileName figure.pdf                                                                                                                                                                                                                               | A11-1 |
|                                                  | IGV                      | 2.4.15                      | For CTCF-ChIP and KLF-ChIP                                                                                                                                                                                                                                                                                                                                                                                    | A11-2 |
| Identification of differentially enriched peaks  | PGS                      | 6.6                         |                                                                                                                                                                                                                                                                                                                                                                                                               | B8    |
| Identification of typical- and super-enhancers   | findPeak.pl              | HOMER Ver 4.10              | -style super<br>-typical TE                                                                                                                                                                                                                                                                                                                                                                                   | B9-1  |
| Discovery of transcription factor-binding motifs | findMotifsGenome.pl      | HOMER Ver 4.10              |                                                                                                                                                                                                                                                                                                                                                                                                               | B9-2  |
|                                                  | TRANSFACT                |                             |                                                                                                                                                                                                                                                                                                                                                                                                               | B9-3  |

**Table S9. Complete enriched motifs found on differential transposase accessible regions of RCAS-Sox2/Grem1/Spry2/beta-catenin-infected skin. Related to Figure 6.**

| Skin Region                           | Gene              | Best Match Motif of DNA-binding Factor from HOMER De Novo Motif Discovery<br>(motif rank #, % of analyzed sequences w/ motif)                                                                                                                                                                                                                                                                                                                                                                     |                                                                                                                                                                                                                                                                                                                                                                                                                                                |
|---------------------------------------|-------------------|---------------------------------------------------------------------------------------------------------------------------------------------------------------------------------------------------------------------------------------------------------------------------------------------------------------------------------------------------------------------------------------------------------------------------------------------------------------------------------------------------|------------------------------------------------------------------------------------------------------------------------------------------------------------------------------------------------------------------------------------------------------------------------------------------------------------------------------------------------------------------------------------------------------------------------------------------------|
| E12.5 Feather Epidermis RCAS-infected | <b>RACS-Sox2</b>  | (1, 32.68%) KLF3, KLF4, KLF5, KLF6, SP1<br>(2, 10.33%) NFY8, NFY4<br>(3, 7.13%) Gabpa, ELK4, ELF1, ELK3, ETV3<br>(4, 9.5%) YY1<br>(5, 10.11%) NRF, RBFox2, RBFox1<br>(6, 8.41%) CTCF, NeuroD1, AtMYB15 (MYB),<br>(7, 24.06%) GRHL1, TFCEP2, RBFox2<br>(8, 10.74%) TP73, TP63<br>(9, 8.01%) TFAP2B, TFAP2A<br>(11, 9.81%) CREB1, CREB1, Atf1 (bZIP)<br>(12, 10.55%) RFX5, RFX6<br>(13, 2.39%) ZBTB33, ZBED1<br>(14, 10.92%) IRF4, TBX20)                                                           | (15, 4.64%) HoxA9, HoxC9, Pdx1, HoxA2, HoxB4, PBx1<br>(18, 0.39%) E2F1, E2F3, E2F2, HNRNPK<br>(19, 1.39%) TEAD1, TEAD4, TEAD3<br>(20, 0.46%) BTD<br>(21, 11.59%) TCF7L2, TCF3, TCF4, TCF7, LEF1<br>(23, 0.48%) XBP1<br>(24, 0.60%) EGR1, BTD, SP2, PCBP2<br>(25, 10.36%) MEIS2<br>(26, 0.65%) CDX4<br>(27, 3.36%) SMAD3, SP4, MYB<br>(28, 0.47%) Sox9, Olig2<br>(29, 0.21%) CEBPG, CEBPB                                                       |
| E12.5 Feather Epidermis RCAS-infected | <b>RCAS-Spry2</b> | (1, 40%) KLF3, KLF4, KLF5, KLF6, KLF7, SP5<br>(2, 9.21%) Gabpa, ELF1, ELK3, ELK4, ETV4, ETV6<br>(3, 18.58%) LHX8, ISX, NKX1-1, NFYB<br>(4, 10.52%) CTCF, NeuroD1, YY1<br>(5, 10.51%) NRF1, RBFox2, RBFox1<br>(6, 15.91%) CREB1, SREBF2, SREBF1, MLX, Atf1 (bZIP)<br>(7, 4.93%) NFYB, NFYA<br>(11, 5.26%) RFX2, RFX3, RFX4, RFX5, XBP1<br>(12, 12.54%) MBNL1, NR2E3, ZFX, SP4, ABI3, RBFox2<br>(13, 0.40%) SAMD4A, E2F6<br>(14, 0.63%) RUNX1, RUNX2, Olig2<br>(15, 1.84%) ZIC1, ZIC3, ZNF143, ACE2 | (16, 3.05%) RFX3, RFX4, RFX5, RFX6<br>(17, 0.30%) Six1, Six2, SDX5<br>(18, 0.39%) IRF4, IRF5, IRF6<br>(19, 0.88%) CDX4<br>(20, 3.93%) TBP, KHDRBS1<br>(22, 0.22%) HBP1, Sox2, Sox9<br>(23, 0.21%) YY1, MATR3<br>(24, 0.38%) E2F3, BTD, ZNF740, SP1, SP5, E2F4, EGR1<br>(25, 2.09%) TEAD1, TEAD3, TEAD4, CNOT4<br>(26, 0.18%) Osr2<br>(27, 45.29%) RBMS3, TBP<br>(28, 2.65%) HuR (ELAV1), PABPC4, SRF                                           |
| E12.5 Feather Epidermis RCAS-infected | <b>RCAS-B-cat</b> | (1, 44.67%) KLF3, KLF4, KLF5, KLF6, KLF7, GC-Box, SP1, SP5<br>(2, 19.25%) NFYB<br>(3, 16.77%) ELK3, ELK4, Gabpa, ELF1, ETV3<br>(4, 13.48%) NRF1, RBFox1, RBFox2<br>(5, 13.96%) Gata2, Gata3, Gata4, Gata5<br>(7, 13.50%) YY1, MATR3, CTCF, E2F2, E2F3<br>(8, 15.63%) CREB1, Atf1, CREM<br>(9, 15.19%) CDX4, TRB2, CDX2<br>(10, 4.57%) THAP, MSI, SFPQ<br>(11, 14.35%) RBM45, E2F1                                                                                                                 | (12, 4.02%) CTCF<br>(13, 2.39%) ZBTB33, ZBED1<br>(14, 1.84%) KHDRBS1<br>(15, 2.11%) ABI3, ZNF143, RBFox2, RBFox1, Zic1, Zic3<br>(16, 7.31%) RFX2, RFX3, RFX4, RFX5, X-box<br>(17, 11.11%) RBM5, E2F6, HNRNPA2B1, SRSF1<br>(18, 6.29%) Hoxc11, Hoxc12, CDX4, Hoxd11, Hoxd12, Hoxa11<br>(19, 1.75%) c-Jun-Cre, Atf1, Atf2, Atf7, THR6, JDP2<br>(20, 1.59%) HuR (ELAV1), PABPC4<br>(21, 0.60%) MYB<br>(23, 0.11%) Nkx2-1, Nkx2-5                  |
| E12.5 Feather Epidermis RCAS-infected | <b>RCAS-Grem1</b> | (1, 34.97%) KLF5<br>(2, 8.79%) CTCF<br>(3, 9.66%) NFY<br>(4, 15.55%) Elk1<br>(5, 11.82%) FUS3<br>(6, 9.77%) AP-2gamma<br>(7, 9.66%) YY1<br>(8, 2.98%) p73(p53)<br>(9, 7.97%) Atf1 (bZIP)<br>(10, 4.01%) GFY<br>(11, 19.98%) Adf1<br>(12, 10.12%) STP3<br>(13, 3.01%) GFX<br>(14, 9.45%) Six1<br>(15, 0.71%) HNRNPK<br>(15, 3.37%) E2F1                                                                                                                                                            | (16, 20.41%) Rfx1<br>(17, 20.41%) MafA(bZIP)<br>(18, 7.59%) prd, grh<br>(19, 12.42%) Olig2<br>(19, 3.16%) twi<br>(20, 3.16%) Cbf1, Usf2, USF1<br>(21, 2.61%) GAGA-repeat, RF8, SRSF10, PTBP1, IRF1, Tb_0220, RAV1<br>(22, 1.74%) E2F3(E2F), hkb, btd<br>(23, 7.93%) A1CF, Rbm42, PUM<br>(24, 2.42%) Ot_0263<br>(26, 0.63%) caudal, cad<br>(28, 2.29%) CAMTA1<br>(29, 0.41%) Su(H), ovo<br>(30, 0.38%) DPL-1<br>(31, 0.27%) Gfi1b               |
| E12.5 Feather Epidermis RA-treated    | <b>RA</b>         | (1, 41.9%) KLF3, KLF5, Sp5(Zf), KLF6(Zf)<br>(2, 18.31%) ETS, Elk1, ELF1, Elk4<br>(3, 15.28%) NFY<br>(4, 13.8%) YY1, MATR3, NeuroD1, CTCF<br>(5, 11.3%) NRF, NRF1, EIF-2ALPHA, RBFox2, RBFOX1, FOX-1<br>(6, 7.95%) Atf1, TGA5, TGA6, FEA4, TGA1<br>(7, 7.9%) CTCF, BORIS(Zf)<br>(8, 27.64%) CRF4<br>(9, 6.33%) MSI1, ZBTB12(Zf)<br>(10, 3.42%) GFY, Rbm42, bZIP910<br>(11, 11.96%) Rfx5, Rfx6<br>(12, 4.02%) GFX, ZBTB33<br>(13, 18.78%) RBM5, SF2, SRSF1, B52, E2F6                               | (14, 10.65%) ZC3H10, Sf3b4<br>(15, 1.55%) TATA-Box, bap, Isl1, Tup<br>(16, 1.03%) AT2G15740(C2H2)<br>(17, 2.55%) Rfx1, X-box, Rfx2, RFX<br>(18, 56.52%) VRN1, SXL, HuR, PABPC4<br>(20, 1.09%) RUNX2, cad, RUNX<br>(22, 1.59%) REB1, ftz, Nkx6.1<br>(23, 1.27%) MYB<br>(24, 0.28%) Rfx5, IRF4, kni<br>(25, 1.33%) ovo, MYB<br>(26, 0.80%) brk<br>(27, 0.23%) E2F3, Egr2, DEL1<br>(28, 0.20%) FUS3<br>(29, 10.30%) cad, SRSF10, TIA1, IRF2, RALY |
